# Supplementary material for: Highly active and durable nitrogen doped-reduced graphene oxide/double perovskite bifunctional hybrid catalysts
Source: Royal Society of Chemistry journal article supplement (doi:10.1039/c7ta02283b), 2017-01-01
Supplement: c7ta02283b1.pdf [file c7ta02283b1.pdf]

## Supporting Information

### Highly active and durable nitrogen doped-reduced graphene oxide/double perovskite bifunctional hybrid catalysts

Nam-In Kim, Rana Arslan Afzal, Sung Ryul Choi, Sung Won Lee, Docheon Ahn, Satadeep Bhattacharjee, Seung-Cheol Lee, Jung Hyun Kim, Jun-Young Park\*

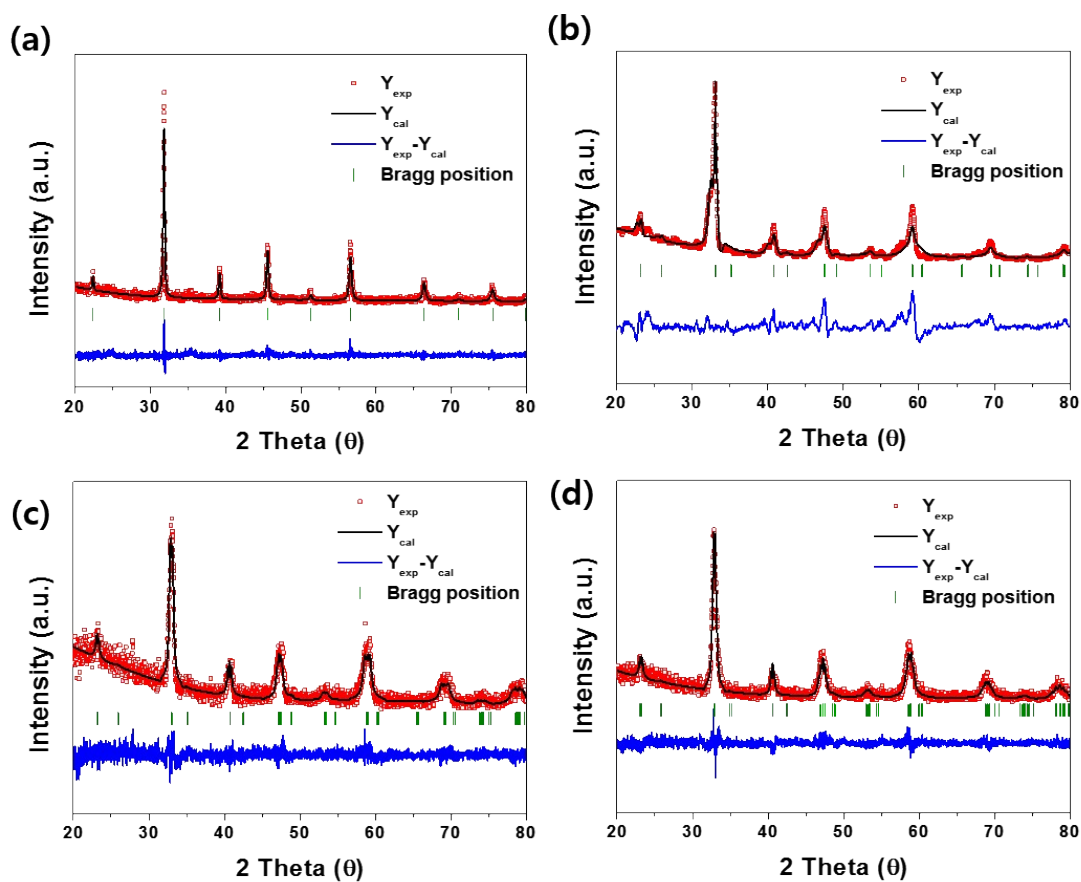

Fig. S1. Rietveld refinement profiles; (a) BSCF, (b) NBSCF, (c) SBSCF, and (d) GBSCF.

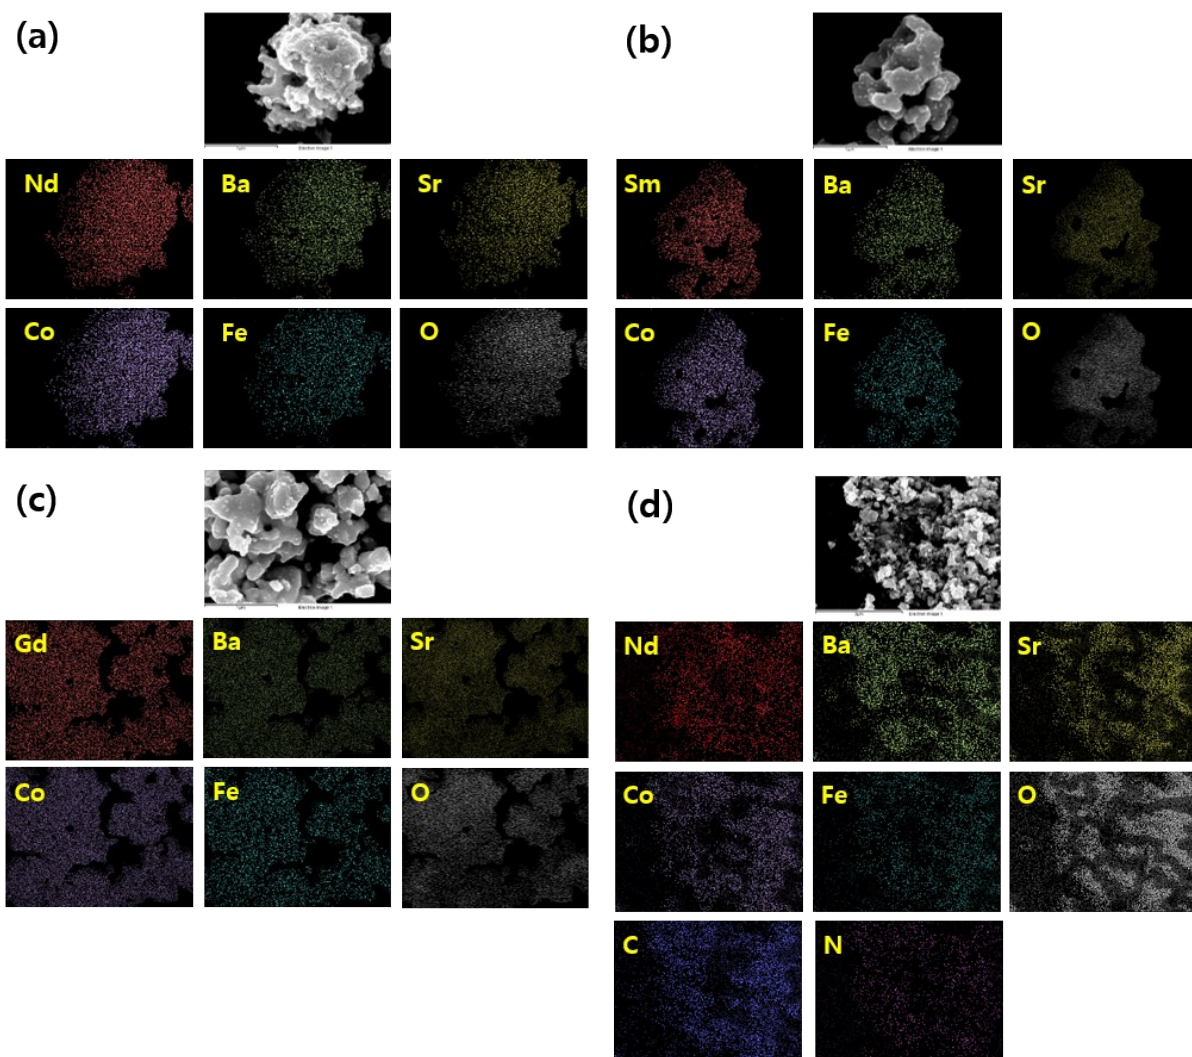

Fig. S2. EDX profiles for area mapping; (a) NBSCF, (b) SBSCF, (c) GBSCF, and (d) NBSCF/N-rGO.

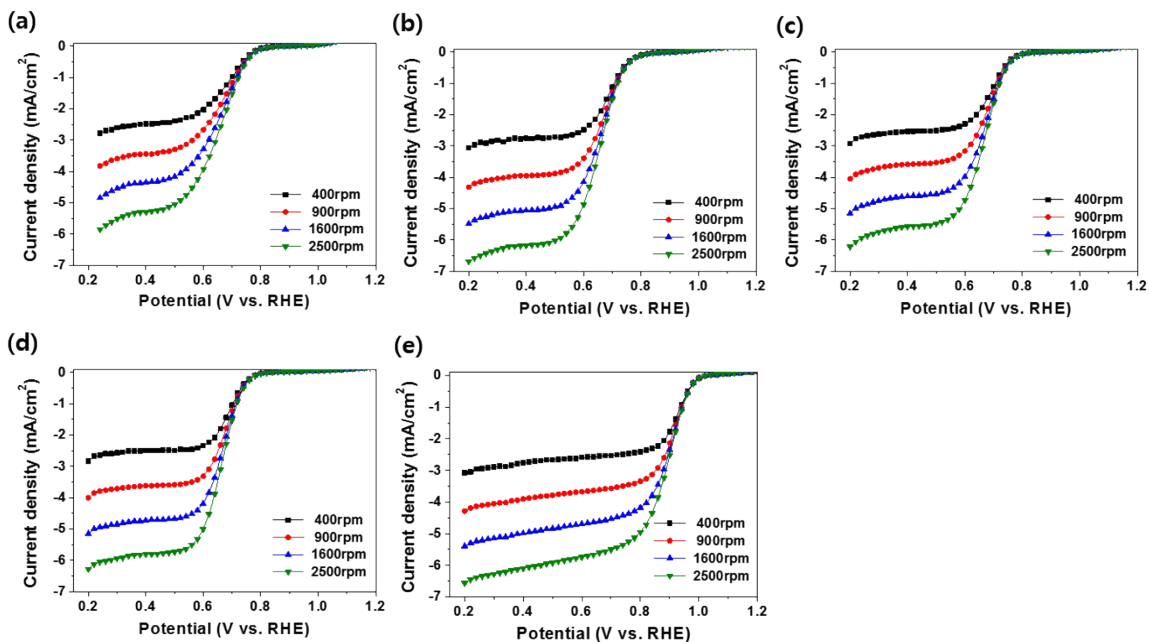

Fig. S3. Plots of oxygen reduction activities at 400 - 2500 rpm; (a) BSCF, (b) NBSCF, (c) SBSCF, (d) GBSCF, and (e) NBSCF/N-rGO.

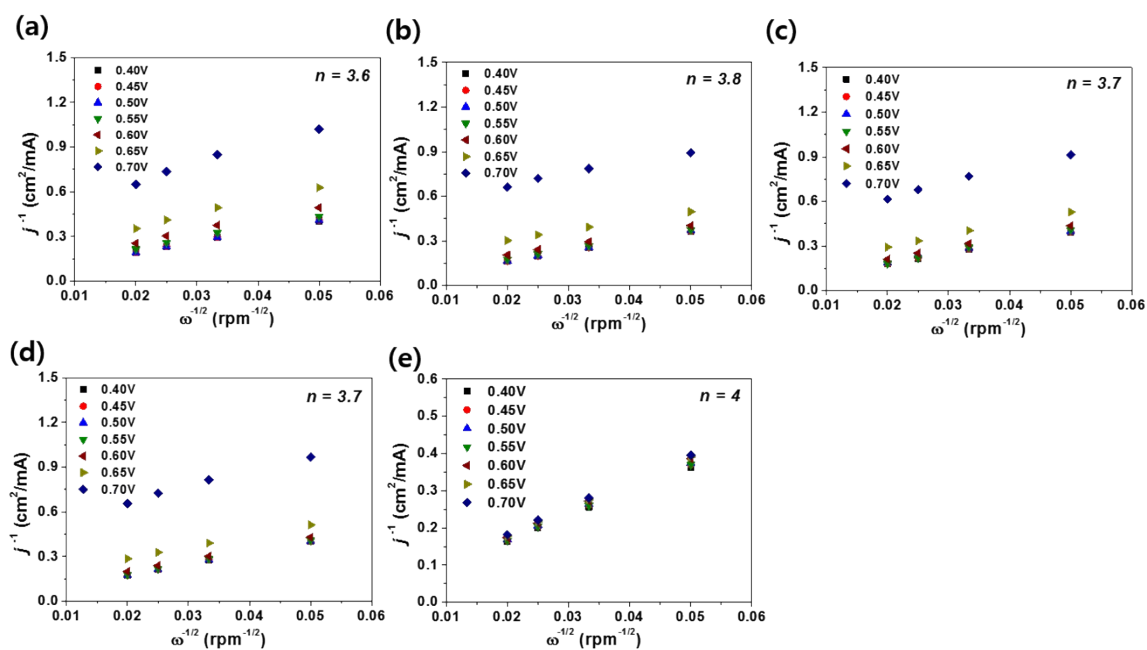

Fig. S4. Koutecky-Levich plots and electron transfer numbers from ORR curves; (a) BSCF, (b) NBSCF, (c) SBSCF, (d) GBSCF, and (e) NBSCF/N-rGO.

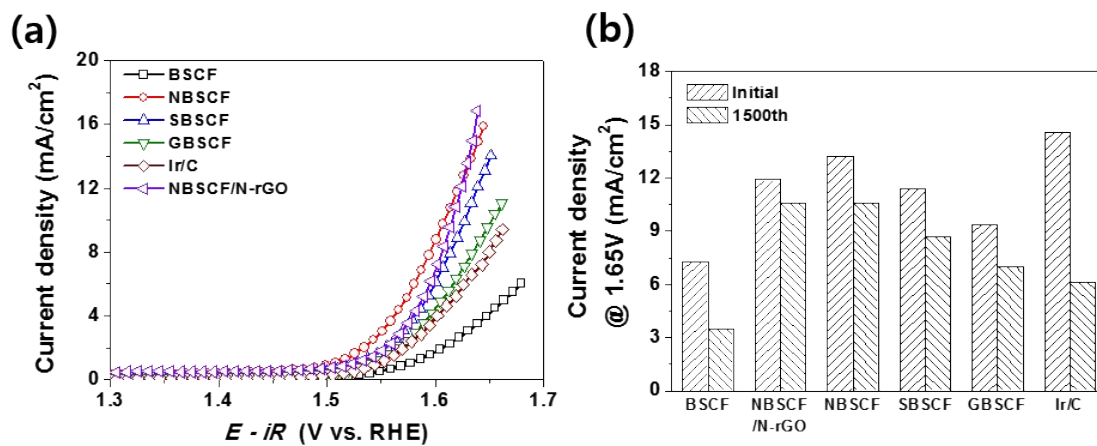

Fig. S5. (a) OER polarization curves after potential cycling and (b) current density values of initial and 1500<sup>th</sup> cycle at 1.65 V in OER curves.

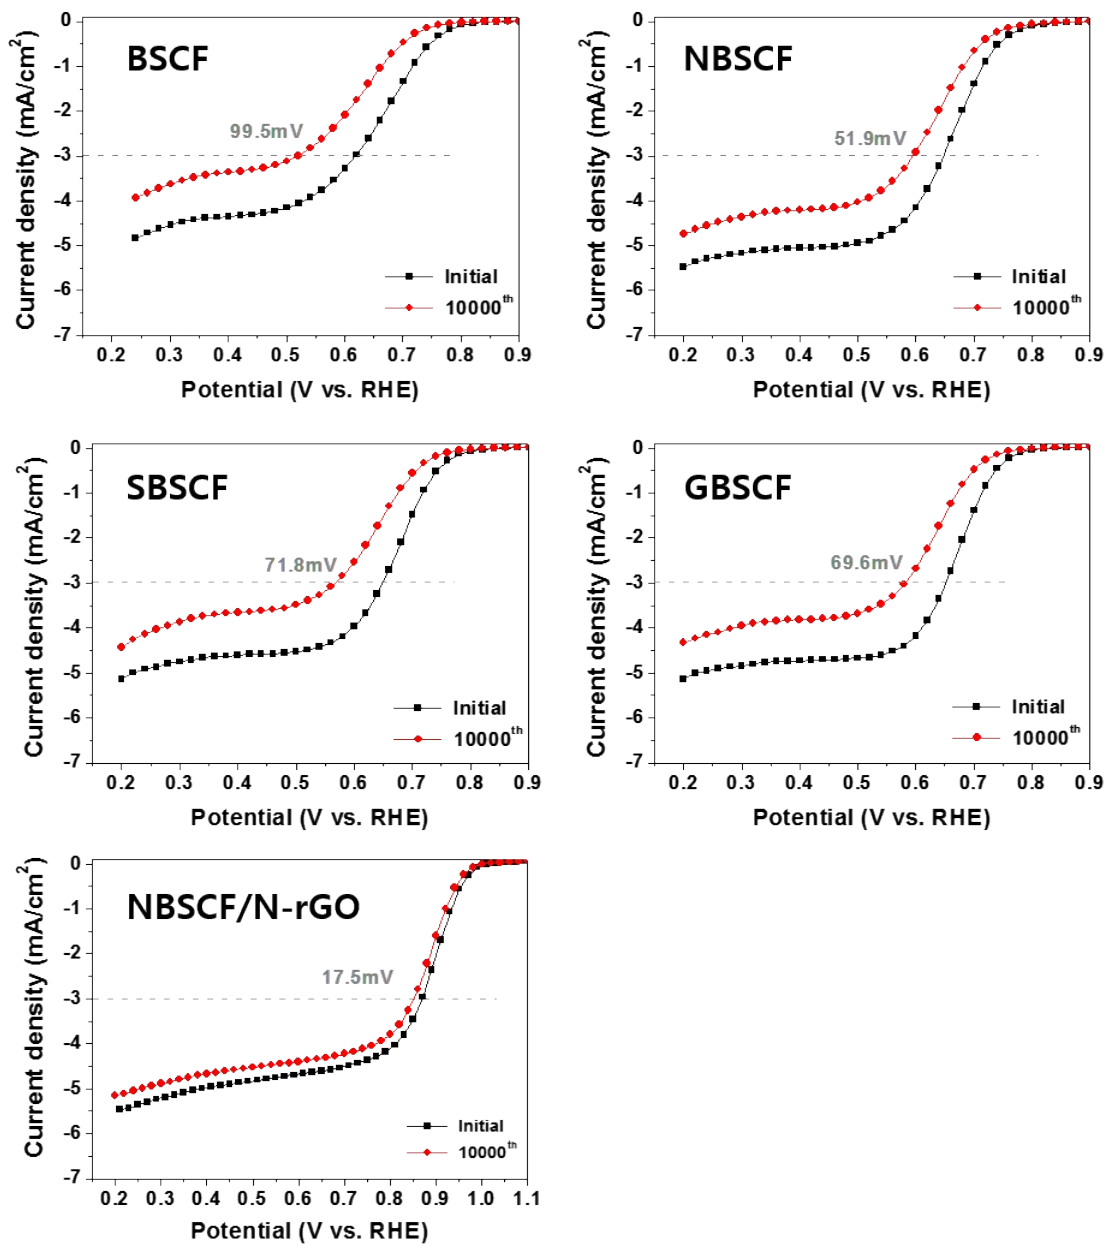

Fig. S6. ORR polarization curves of the catalysts before and after 10,000 cycles of potential sweep (0.6 – 1.2 V).

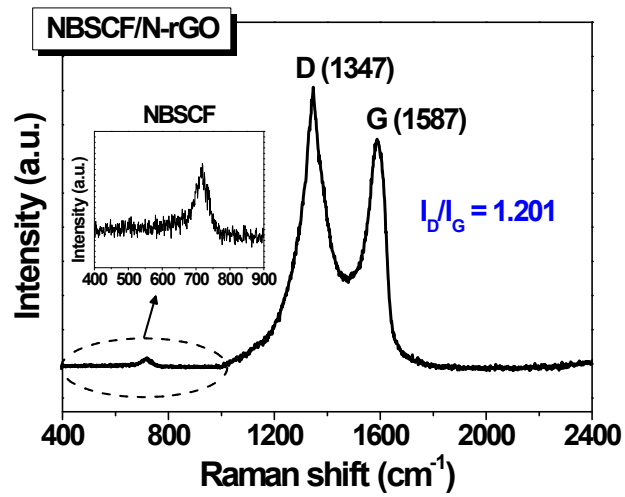

Fig S7. Raman spectra of NBSCF/N-rGO catalyst.

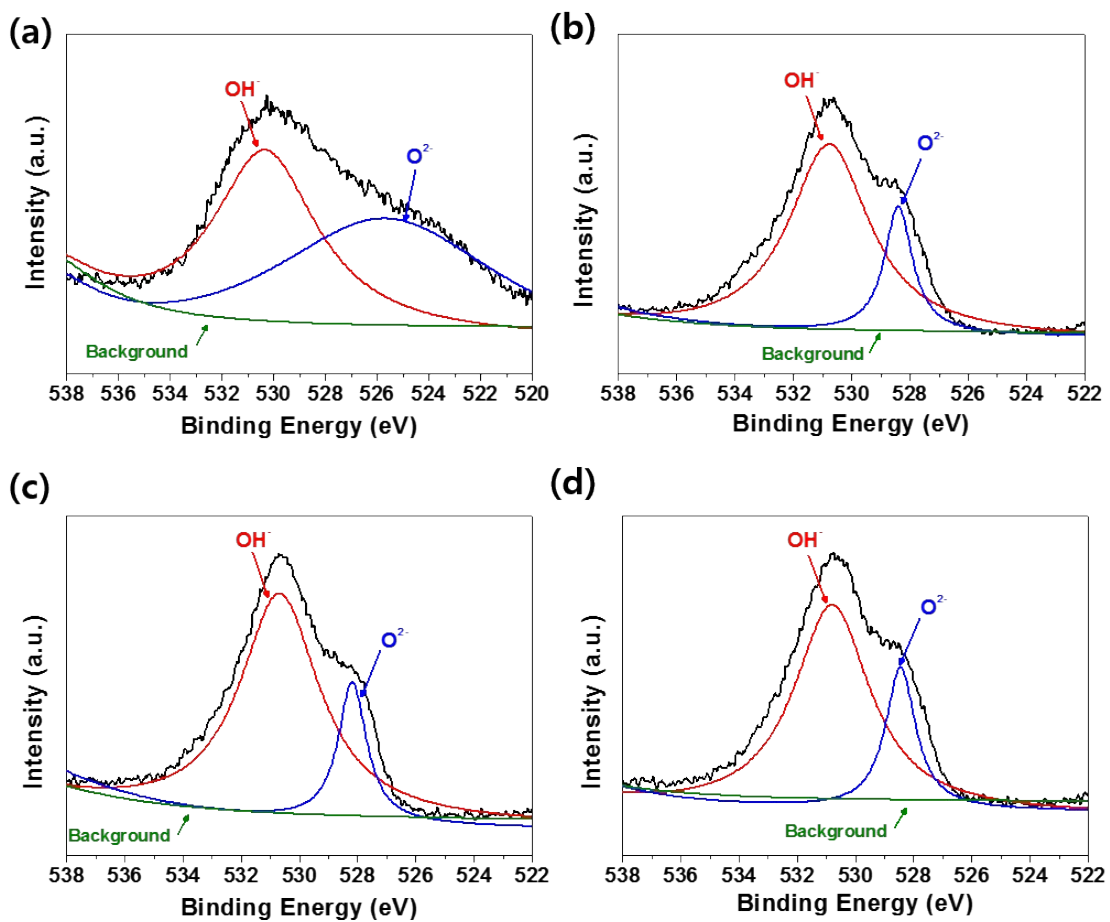

Fig. S8. O 1s XPS spectra of the catalysts; (a) BSCF, (b) NBSCF, (c) SBSCF, and (d) GBSCF.

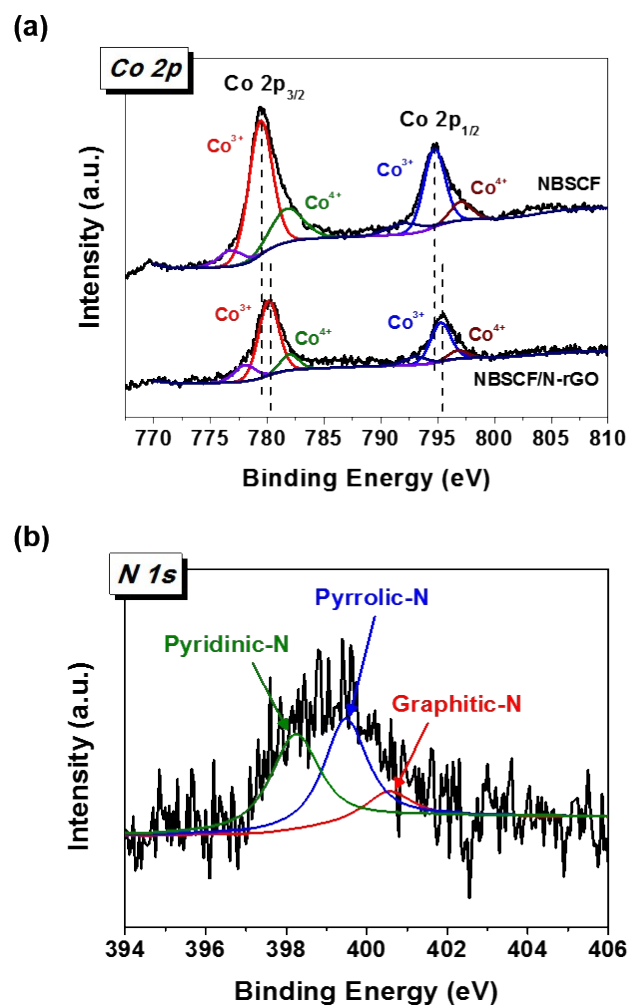

Fig S9. XPS spectra of NBSCF/N-rGO and NBSCF; (a) Co 2p peaks in NBSCF/N-rGO and NBSCF and (b) N 1s peak in NBSCF/N-rGO.

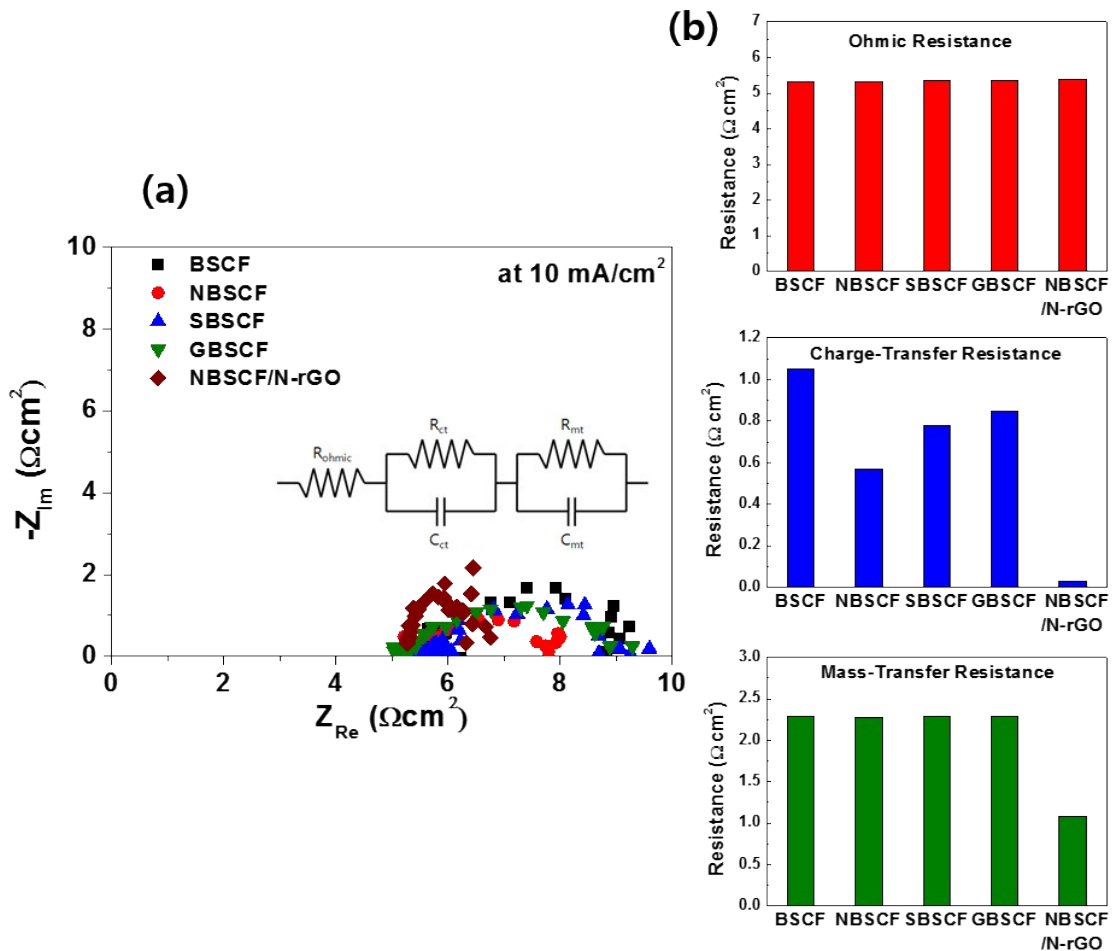

Fig. S10. (a) Nyquist plots of the catalysts at 10 mA cm<sup>-2</sup>. (b) Calculated ohmic, charge-transfer, and mass-transfer resistances of the catalysts from Nyquist plots using an appropriate equivalent circuit.



Table S1. Crystal structure parameters of the catalysts from high resolution-synchrotron XRD spectrum (Rietveld refinement profile).

| Catalysts    | Space group                    | Phase structure | Lattice parameters (Å) |        |        | Unit cell volume (Å <sup>3</sup> ) |
|--------------|--------------------------------|-----------------|------------------------|--------|--------|------------------------------------|
|              |                                |                 | a-axis                 | b-axis | c-axis |                                    |
| <b>BSCF</b>  | <i>Pm<math>\bar{3}</math>m</i> | Cubic           | 3.9794                 | -      | -      | 63.02                              |
| <b>NBSCF</b> | <i>Pmmm</i>                    | Orthorhombic    | 3.8563                 | 3.8270 | 7.7365 | 114.18                             |
| <b>SBSCF</b> | <i>Pmmm</i>                    | Orthorhombic    | 3.8282                 | 3.8243 | 7.7386 | 113.29                             |
| <b>GBSCF</b> | <i>Pmmm</i>                    | Orthorhombic    | 3.8094                 | 3.8240 | 7.6228 | 111.04                             |

Table S2. Elemental compositions of NBSCF, SBSCF, and GBSCF as weight ratios from SEM-EDX results.

| Catalysts    | Lanthanides (Nd, Sm and Gd) | Ba   | Sr   | Co    | Fe   | O     |
|--------------|-----------------------------|------|------|-------|------|-------|
| <b>NBSCF</b> | 9.28                        | 4.39 | 4.75 | 13.54 | 5.45 | 62.59 |
| <b>SBSCF</b> | 9.92                        | 4.01 | 5.09 | 13.19 | 4.95 | 62.84 |
| <b>GBSCF</b> | 10.66                       | 4.81 | 5.13 | 14.71 | 4.67 | 60.02 |
